# Supplementary material for: The Papain-like Cysteine Protease HpXBCP3 from Haematococcus pluvialis Involved in the Regulation of Growth, Salt Stress Tolerance and Chlorophyll Synthesis in Microalgae
Source: MDPI journal article supplement (doi:10.3390/ijms222111539), 2021-10-26
Supplement: s1 [file s1]

Table S1. Accession number of *CrCEP1* and *Arabidopsis* PLCPs in NCBI.

| Gene Name | Accession No. in NCBI |
|-----------|-----------------------|
| AtALP     | At5g60360             |
| AtALP2    | At3g45310             |
| AtCEP1    | At5g50260             |
| AtCEP2    | At3g48340             |
| AtCEP3    | At3g48350             |
| AtCTB1    | At1g02300             |
| AtCTB2    | At1g02305             |
| AtCTB3    | At4g01610             |
| AtPAP1    | At2g34080             |
| AtPAP2    | At1g29090             |
| AtPAP3    | At1g29080             |
| AtPAP4    | At2g27420             |
| AtPAP5    | At3g49340             |
| AtRD19A   | At4g39090             |
| AtRD19B   | At2g21430             |
| AtRD19C   | At4g16190             |
| AtRD19D   | At3g54940             |
| AtRD21A   | At1g47128             |
| AtRD21B   | At5g43060             |
| AtRD21C   | At3g19390             |
| AtRDL1    | At4g36880             |
| AtRDL2    | At3g19400             |
| AtRDL3    | At3g43960             |
| AtRDL4    | At4g11310             |
| AtRDL5    | At3g11320             |
| AtRDL6    | At4g23520             |
| AtSAG12   | At5g45890             |
| AtTHI1    | At1g06260             |
| AtXBCP3   | At1g09850             |
| AtXCP1    | At4g35350             |
| AtXCP2    | At1g20850             |
| CrCEP1    | XM_001697570.1        |

Table S2. Comparison of expression levels of 8 genes obtained by qRT-PCR analysis and by RNA-seq.

| gene ID               | H12 vs WT           |          | H28 vs WT           |          |
|-----------------------|---------------------|----------|---------------------|----------|
|                       | Transcriptomic data | qRT-PCR  | Transcriptomic data | qRT-PCR  |
| CHLRE_01g01<br>9250v5 | 2.241293166         | 1.537941 | 2.741623102         | 2.624    |
| CHLRE_08g37<br>2550v5 | 2.153336356         | 3.483752 | 4.247394795         | 2.099    |
| CHLRE_16g65           | 2.255848981         | 1.435063 | 3.340206019         | 1.739001 |

|                                 |             |          |             |          |  |
|---------------------------------|-------------|----------|-------------|----------|--|
| 6700v5                          |             |          |             |          |  |
| CHLRE_13g60                     | 0.189475239 | 0.870019 | 0.233921914 | 0.359051 |  |
| 3350v5                          |             |          |             |          |  |
| CHLRE_01g01                     | 2.241293166 | 1.495483 | 2.741623102 | 1.429616 |  |
| 9250v5                          |             |          |             |          |  |
| CHLRE_01g04                     | 0.237564735 | 0.071814 | 0.370577869 | 0.055956 |  |
| 5200v5                          |             |          |             |          |  |
| CHLRE_12g49                     | 2.088139141 | 1.278584 | 3.328684036 | 2.197714 |  |
| 1050v5                          |             |          |             |          |  |
| CHLRE_12g55                     | 2.05829569  | 1.406596 | 2.281356788 | 3.902872 |  |
| 8100v5                          |             |          |             |          |  |
| Pearson Correlation Coefficient |             | 0.6637   |             | 0.9655   |  |

Table S3. The annotations of genes involved in this article in Genebank and Phytozome. Blast the selected sequences in the transcriptome data in genebank (<https://www.ncbi.nlm.nih.gov/genbank/>) and phytozome (<https://phytozome-next.jgi.doe.gov/>) to find the sequences with the highest similarity, and the annotation results are consistent with the annotations in the transcriptome data.

| Definition | gene_id           | Accession number in genebank | E-value   | Accession number in Phytozome | E-value |
|------------|-------------------|------------------------------|-----------|-------------------------------|---------|
| Pri2       | CHLRE_06g293000v5 | XM_001701548.1               | 0         | Cre06.g293000.t1.1            | 0       |
| RFA1       | CHLRE_16g651000v5 | XM_001698105.1               | 0         | Cre16.g651000.t1.2            | 0       |
| MCM2       | CHLRE_07g338000v5 | XM_001700028.1               | 0         | Cre07.g338000.t1.2            | 0       |
| MCM3       | CHLRE_06g295700v5 | XM_001691274.1               | 0         | Cre06.g295700.t1.1            | 0       |
| MCM4       | CHLRE_07g316850v5 | XM_001700758.1               | 0         | Cre07.g316850.t1.2            | 0       |
| MCM6       | CHLRE_03g178650v5 | XM_001703203.1               | 0         | Cre03.g178650.t1.1            | 0       |
| Histone 2A | CHLRE_13g567700v5 | XM_001693648.1               | 0         | Cre13.g567700.t1.2            | 0       |
| Histone H3 | CHLRE_02g104800v5 | XM_001699933.1               | 2.00E-162 | Cre02.g104800.t1.1            | 0       |
| CDKB1      | CHLRE_08g372550v5 | XM_001701247.1               | 0         | Cre08.g372550.t1.1            | 0       |
| CYCA1      | CHLRE_03g207900v5 | XM_001693115.1               | 0         | Cre03.g207900.t1.1            | 0       |
| CYCB1      | CHLRE_08g370401v5 | XM_001701235.1               | 0         | Cre08.g370401.t1.1            | 0       |
| RING       | E3 CHLRE_03       | XM_001703509                 | 0         | Cre03.g161500.t               | 0       |

|                                 |                       |                    |   |                 |   |
|---------------------------------|-----------------------|--------------------|---|-----------------|---|
| ubiquitin<br>ligase             | g161500v5             | .1                 |   | 1.1             |   |
| Glutamate<br>synthase<br>(NADH) | CHLRE_13<br>g592200v5 | XM_001693030<br>.1 | 0 | Cre13.g592200.t | 0 |
| WD40 protein                    | CHLRE_01<br>g036100v5 | XM_001689586<br>.1 | 0 | Cre01.g036100.t | 0 |
|                                 | CHLRE_02<br>g073650v5 | XM_001701768<br>.1 | 0 | Cre02.g073650.t | 0 |
|                                 | CHLRE_02<br>g115250v5 | XM_001699601<br>.1 | 0 | Cre02.g115250.t | 0 |
|                                 | CHLRE_06<br>g255950v5 | XM_001696319<br>.1 | 0 | Cre06.g255950.t | 0 |
|                                 | CHLRE_16<br>g652950v5 | XM_001698168<br>.1 | 0 | Cre16.g652950.t | 0 |
| TOC1, APRR1                     | CHLRE_16<br>g676421v5 | XM_001695726<br>.1 | 0 | Cre16.g676421.t | 0 |

Table S4. The DEGs involved in this study and their relative expression level in OEH to WT.

| Biological process    | gene_id           | Definition                  | OEH VS WT |
|-----------------------|-------------------|-----------------------------|-----------|
| DNA replication       | CHLRE_06g293000v5 | Pri2                        | up 2.33   |
|                       | CHLRE_16g651000v5 | RFA1                        | up 2.71   |
|                       | CHLRE_07g338000v5 | MCM2                        | up 3.87   |
|                       | CHLRE_06g295700v5 | MCM3                        | up 3.28   |
|                       | CHLRE_07g316850v5 | MCM4                        | up 3.70   |
|                       | CHLRE_03g178650v5 | MCM6                        | up 4.33   |
|                       | CHLRE_13g567700v5 | Histone 2A                  | up 3.63   |
|                       | CHLRE_02g104800v5 | Histone H3                  | up 3.56   |
|                       | CHLRE_08g372550v5 | CDKB1                       | up 4.25   |
|                       | CHLRE_03g207900v5 | CYCA1                       | up 3.41   |
| cell cycle regulation | CHLRE_08g370401v5 | CYCB1                       | up 3.42   |
|                       | CHLRE_03g161500v5 | RING E3 ubiquitin<br>ligase | up 3.77   |

|                                   |               |                           |         |
|-----------------------------------|---------------|---------------------------|---------|
|                                   | CHLRE_02g073  | WD40 protein              | up 3.34 |
| cell senescence                   | 650v5         |                           |         |
|                                   | CHLRE_06g255  |                           | up 3.19 |
|                                   | 950v5         |                           |         |
|                                   | CHLRE_16g652  |                           | up 3.78 |
|                                   | 950v5         |                           |         |
|                                   | CHLRE_01g036  |                           | up 2.93 |
|                                   | 100v5         |                           |         |
|                                   | CHLRE_02g1152 |                           | up 3.80 |
|                                   | 50v5          |                           |         |
|                                   | CHLRE_16g676  | TOC1, APRR1               | up 2.89 |
|                                   | 421v5         |                           |         |
| NADH-dependent glutamate synthase | CHLRE_13g592  | Glutamate synthase (NADH) | up 3.22 |
|                                   | 200v5         |                           |         |

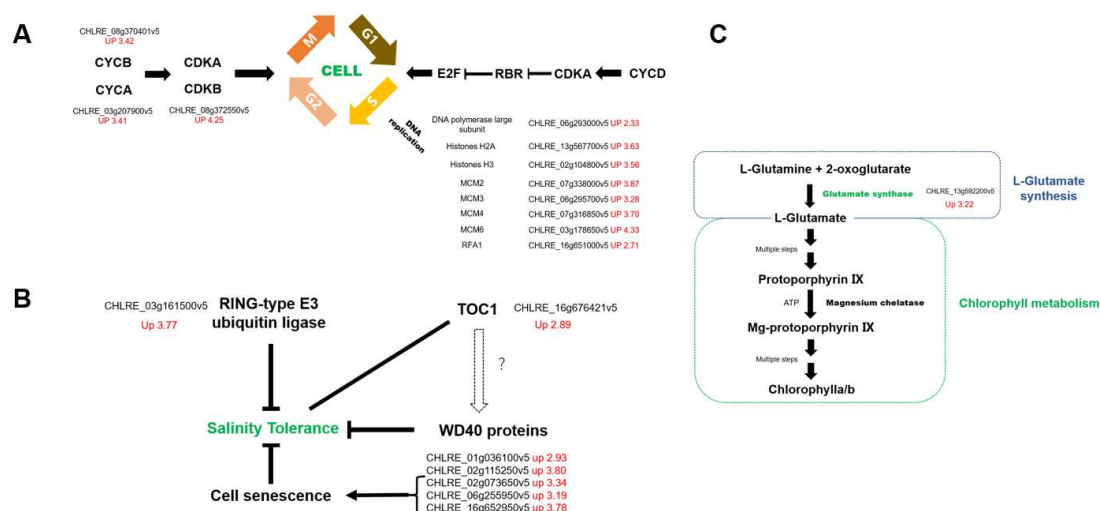

Figure S1. (A) Genes involved in cell cycle regulation and DNA replication were up-regulated in OEH. The fold changes of genes were in red. (B) Up-regulation of RING-type E3 ligase and WD 40 proteins decreased salt stress tolerance in OEH. Arrow indicates positive effects and blunt head indicates a positive effect. The straight line indicates a relationship. The dotted arrow indicates that the relationship is unknown. The fold changes of genes were in red. (C) Chlorophyll synthesis affected by *HpXBCP3* expression in OEH.
